# Supplementary material for: Onset of Senescence and Steatosis in Hepatocytes as a Consequence of a Shift in the Diacylglycerol/Ceramide Balance at the Plasma Membrane
Source: MDPI journal article supplement (doi:10.3390/cells10061278), 2021-05-21

Original blots for Fig. 2E.

PKCa/b

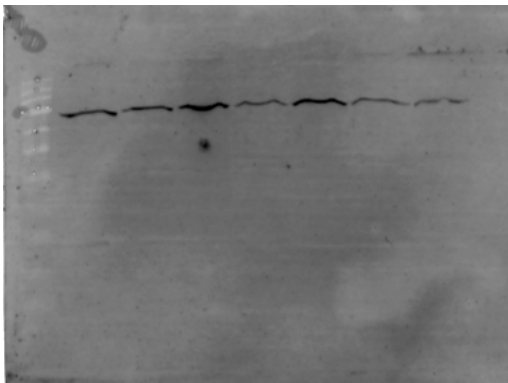

pPKD/PKC m

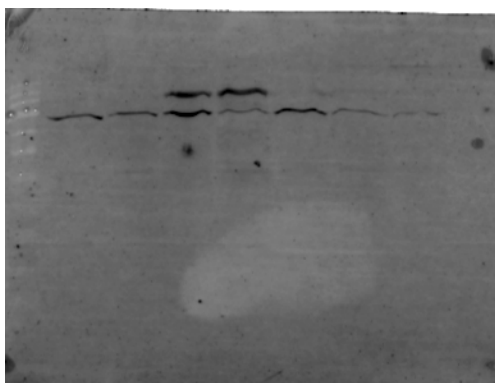

B-actin

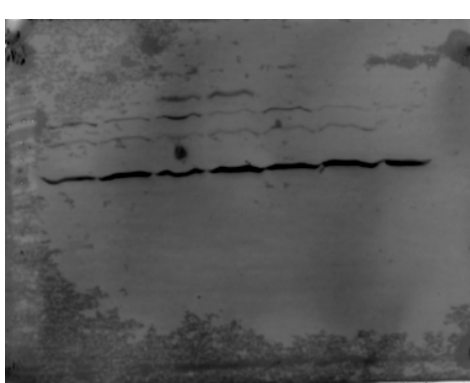

Original blots for Fig. 5A.

Complex I

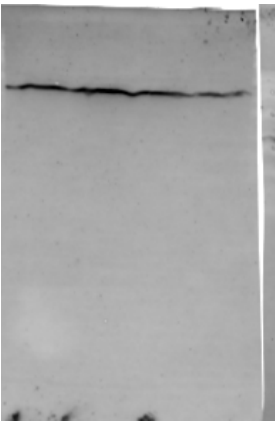

Complex III

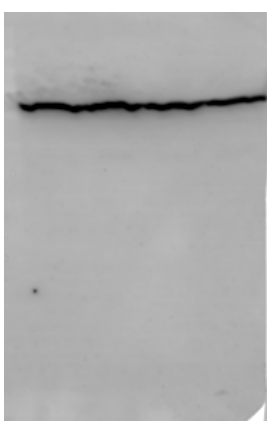

Complex IV

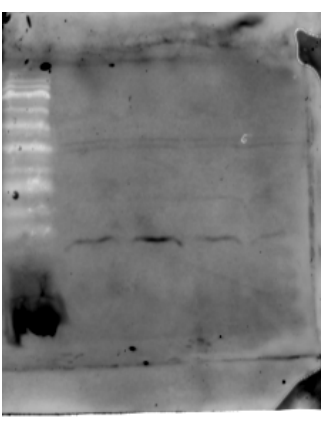

Complex V

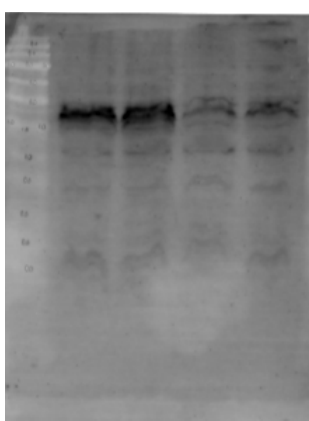

VDAC

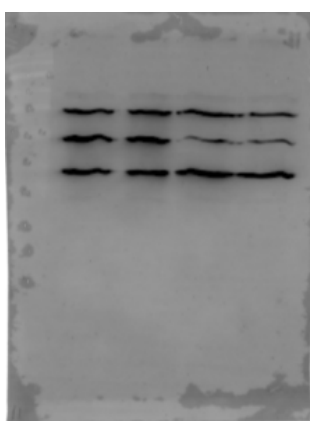

Original blots for Fig. 6D

pAMPK

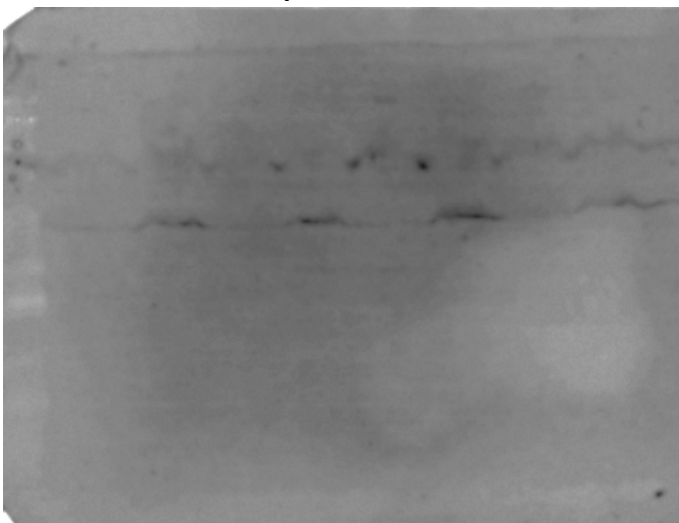

AMPK

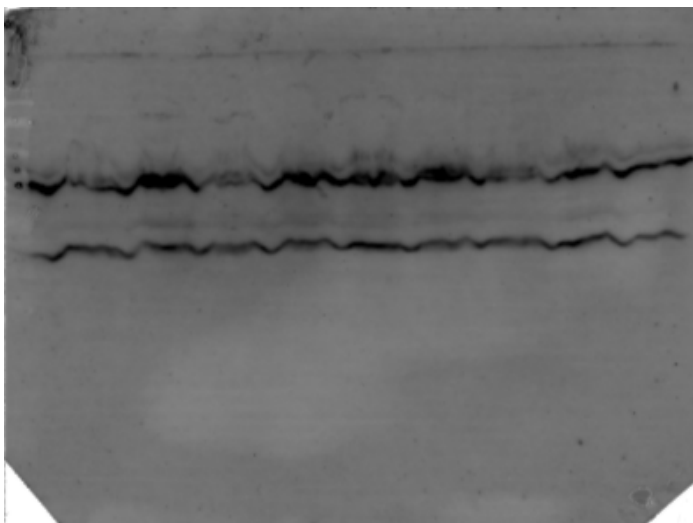

Supplement: s1 [file s1]
